# Supplementary material for: Psychosocial development in survivors of childhood differentiated thyroid carcinoma: a cross-sectional study
Source: PubMed Central journal article supplement (PMC5811933; doi:10.1530/eje-17-0741), 2017-12-18
Supplement: eje-178-215-t001.pdf [file eje-178-215-t001.pdf]

**Supplemental Table 1a. Social development in survivors of childhood DTC versus peer controls and comparison group on item level**

|                                                                                        | <b>DTC Survivors</b><br>n = 39 | <b>Peer controls</b><br>n = 30 | <b>Comparison group</b><br>n = 508 | <i>P</i> value     | <i>P</i> Value           |
|----------------------------------------------------------------------------------------|--------------------------------|--------------------------------|------------------------------------|--------------------|--------------------------|
| <b>At least one year competitive sports, elementary school, n (%)</b>                  |                                |                                |                                    | .440 <sup>1</sup>  | 0.175 <sup>2</sup>       |
| Yes                                                                                    | 36 (92)                        | 24 (80)                        | 427 (84)                           |                    |                          |
| No                                                                                     | 3 (8)                          | 4 (13)                         | 80 (16)                            |                    |                          |
| Missing                                                                                | 0 (0)                          | 2 (7)                          | 1 (0)                              |                    |                          |
| <b>Number of friends in kindergarten through third grade, elementary school, n (%)</b> |                                |                                |                                    | .034 <sup>2</sup>  | <b>0.007<sup>2</sup></b> |
| Less than 4                                                                            | 6 (15)                         | 11 (37)                        | 187 (37)                           |                    |                          |
| 4 or more                                                                              | 33 (85)                        | 18 (60)                        | 319 (63)                           |                    |                          |
| Missing                                                                                | 0 (0)                          | 1 (3)                          | 2 (0)                              |                    |                          |
| <b>Number of friends in fourth-sixth grade, elementary school, n (%)</b>               |                                |                                |                                    | 0.534 <sup>2</sup> | 0.203 <sup>2</sup>       |
| Less than 4                                                                            | 8 (21)                         | 8 (27)                         | 156 (31)                           |                    |                          |
| 4 or more                                                                              | 30 (77)                        | 21 (70)                        | 349 (69)                           |                    |                          |
| Missing                                                                                | 1 (3)                          | 1 (3)                          | 3 (1)                              |                    |                          |
| <b>Best friend, elementary school, n (%)</b>                                           |                                |                                |                                    | 0.156 <sup>1</sup> | 0.011 <sup>2</sup>       |
| Yes                                                                                    | 36 (92)                        | 23 (77)                        | 377 (74)                           |                    |                          |
| No                                                                                     | 3 (8)                          | 6 (20)                         | 131 (26)                           |                    |                          |
| Missing                                                                                | 0 (0)                          | 1 (3)                          | 0 (0)                              |                    |                          |
| <b>Most of time playing with ... elementary school, n (%)</b>                          |                                |                                |                                    | 0.066 <sup>2</sup> | 1.000 <sup>1</sup>       |
| Friends                                                                                | 34 (87)                        | 20 (67)                        | 436 (86)                           |                    |                          |
| Brothers and/or sisters, parents, on your own                                          | 5 (13)                         | 9 (30)                         | 62 (12)                            |                    |                          |
| Missing                                                                                | 0 (0)                          | 1 (3)                          | 10 (2)                             |                    |                          |
| <b>At least one year competitive sports, middle and/or high school, n (%)</b>          |                                |                                |                                    | 0.800 <sup>2</sup> | 0.809 <sup>2</sup>       |
| Yes                                                                                    | 28 (72)                        | 20 (67)                        | 373 (73)                           |                    |                          |
| No                                                                                     | 11 (28)                        | 9 (30)                         | 134 (26)                           |                    |                          |
| Missing                                                                                | 0 (0)                          | 1 (3)                          | 1 (0)                              |                    |                          |
| <b>Number of friends, middle and/or high school, n (%)</b>                             |                                |                                |                                    | 0.547 <sup>2</sup> | 0.965 <sup>2</sup>       |
| Less than 4                                                                            | 12 (31)                        | 7 (23)                         | 154 (30)                           |                    |                          |
| 4 or more                                                                              | 27 (69)                        | 22 (73)                        | 352 (69)                           |                    |                          |
| Missing                                                                                | 0 (0)                          | 1 (3)                          | 2 (0)                              |                    |                          |
| <b>Best friend, middle and/or high school, n (%)</b>                                   |                                |                                |                                    | 0.853 <sup>2</sup> | 0.740 <sup>2</sup>       |
| Yes                                                                                    | 27 (69)                        | 20 (67)                        | 372 (73)                           |                    |                          |
| No                                                                                     | 11 (28)                        | 9 (30)                         | 134 (26)                           |                    |                          |
| Missing                                                                                | 1 (3)                          | 1 (3)                          | 2 (0)                              |                    |                          |
| <b>Belonging to a group of friends, middle and/or high school, n (%)</b>               |                                |                                |                                    | 0.574 <sup>1</sup> | 0.010 <sup>2</sup>       |
| Yes                                                                                    | 37 (95)                        | 27 (90)                        | 403 (79)                           |                    |                          |
| No                                                                                     | 1 (3)                          | 2 (7)                          | 97 (19)                            |                    |                          |
| Missing                                                                                | 1 (3)                          | 1 (3)                          | 8 (2)                              |                    |                          |
| <b>Leisure time, mainly with ... middle and/or high school, n (%)</b>                  |                                |                                |                                    | 0.747 <sup>1</sup> | 0.602 <sup>2</sup>       |
| Friends                                                                                | 32 (82)                        | 25 (83)                        | 430 (85)                           |                    |                          |
| Brothers and/or sisters, parents, on your own                                          | 7 (18)                         | 4 (13)                         | 75 (15)                            |                    |                          |
| Missing                                                                                | 0 (0)                          | 1 (3)                          | 3 (1)                              |                    |                          |
| <b>Going to a bar or disco, middle and/or high school, n (%)</b>                       |                                |                                |                                    | 0.310 <sup>2</sup> | 0.166 <sup>2</sup>       |
| Sometimes / often                                                                      | 29 (74)                        | 25 (83)                        | 430 (85)                           |                    |                          |
| Never                                                                                  | 9 (23)                         | 4 (13)                         | 77 (15)                            |                    |                          |
| Missing                                                                                | 1 (3)                          | 1 (3)                          | 1 (0)                              |                    |                          |
| <b>At least one year competitive sports, after high school, n (%)</b>                  |                                |                                |                                    | 0.197 <sup>2</sup> | 0.081 <sup>2</sup>       |
| Yes                                                                                    | 13 (33)                        | 14 (47)                        | 243 (48)                           |                    |                          |
| No                                                                                     | 25 (64)                        | 14 (47)                        | 254 (50)                           |                    |                          |
| Missing                                                                                | 1 (3)                          | 2 (7)                          | 11 (2)                             |                    |                          |

<sup>1</sup> Fisher's Exact test <sup>2</sup> Chi squares test. *P* Values in bold are *P* values <0.01
