# Supplementary material for: Psychosocial development in survivors of childhood differentiated thyroid carcinoma: a cross-sectional study
Source: PubMed Central journal article supplement (PMC5811933; doi:10.1530/eje-17-0741), 2017-12-18
Supplement: eje-178-215-t002.pdf [file eje-178-215-t002.pdf]

**Supplemental Table 1b. Autonomy development in survivors of childhood DTC versus peer controls and comparison group on item level**

|                                                                              | <b>DTC Survivors</b><br>n = 39 | <b>Peer controls</b><br>n = 30 | <b>Comparison group</b><br>n = 508 | <i>P</i> value     | <i>P</i> Value     |
|------------------------------------------------------------------------------|--------------------------------|--------------------------------|------------------------------------|--------------------|--------------------|
| <b>Regular chores/tasks in your family, elementary school, n (%)</b>         |                                |                                |                                    | <i>P</i> value     | <i>P</i> Value     |
| Yes                                                                          | 10 (26)                        | 12 (40)                        | 233 (46)                           | 0.170 <sup>2</sup> | 0.013 <sup>2</sup> |
| No                                                                           | 29 (74)                        | 17 (57)                        | 273 (54)                           |                    |                    |
| Missing                                                                      | 0 (0)                          | 1 (3)                          | 2 (0)                              |                    |                    |
| <b>Paid jobs, elementary school, n (%)</b>                                   |                                |                                |                                    | 0.278 <sup>2</sup> | 0.309 <sup>2</sup> |
| Yes                                                                          | 10 (26)                        | 11 (37)                        | 170 (33)                           |                    |                    |
| No                                                                           | 29 (74)                        | 18 (60)                        | 336 (66)                           |                    |                    |
| Missing                                                                      | 0 (0)                          | 1 (3)                          | 2 (0)                              |                    |                    |
| <b>Regular chores/tasks in your family, middle and/or high school, n (%)</b> |                                |                                |                                    | 0.038 <sup>2</sup> | 0.042 <sup>2</sup> |
| Yes                                                                          | 17 (44)                        | 20 (67)                        | 304 (60)                           |                    |                    |
| No                                                                           | 22 (56)                        | 9 (30)                         | 201 (40)                           |                    |                    |
| Missing                                                                      | 0 (0)                          | 1 (3)                          | 3 (1)                              |                    |                    |
| <b>Paid jobs, middle and/or high school, n (%)</b>                           |                                |                                |                                    | 0.715 <sup>1</sup> | 0.805 <sup>1</sup> |
| At the age of 18 or younger                                                  | 35 (90)                        | 25 (83)                        | 443 (87)                           |                    |                    |
| At the age of 19 or older / never                                            | 4 (10)                         | 4 (13)                         | 64 (13)                            |                    |                    |
| Missing                                                                      | 0 (0)                          | 1 (3)                          | 1 (0)                              |                    |                    |
| <b>First time vacation without adults, n (%)</b>                             |                                |                                |                                    | 0.213 <sup>2</sup> | 0.096 <sup>2</sup> |
| At the age of 17 or younger                                                  | 26 (67)                        | 15 (50)                        | 268 (53)                           |                    |                    |
| At the age of 18 or older / never                                            | 13 (33)                        | 14 (47)                        | 239 (47)                           |                    |                    |
| Missing                                                                      | 0 (0)                          | 1 (3)                          | 1 (0)                              |                    |                    |
| <b>Leaving parents' home, n (%)</b>                                          |                                |                                |                                    | 0.156 <sup>2</sup> | 0.362 <sup>2</sup> |
| Not living with parents                                                      | 28 (72)                        | 25 (83)                        | 328 (64)                           |                    |                    |
| Still living with parents                                                    | 11 (28)                        | 4 (13)                         | 180 (35)                           |                    |                    |
| Missing                                                                      | 0 (0)                          | 1 (3)                          | 0 (0)                              |                    |                    |

<sup>1</sup> Fisher's Exact test <sup>2</sup> Chi squares test. *P* Values in bold are *P* values <0.01
