# Supplementary material for: Psychosocial development in survivors of childhood differentiated thyroid carcinoma: a cross-sectional study
Source: PubMed Central journal article supplement (PMC5811933; doi:10.1530/eje-17-0741), 2017-12-18
Supplement: eje-178-215-t003.pdf [file eje-178-215-t003.pdf]

**Supplemental Table 1c. Psychosexual development in survivors of childhood DTC versus peer controls and comparison group on item level**

|                                             | <b>DTC<br/>Survivors<br/>n = 39</b> | <b>Peer<br/>controls<br/>n = 30</b> | <b>Comparison<br/>group<br/>n = 508</b> | <i>P</i> value           | <i>P</i> Value           |
|---------------------------------------------|-------------------------------------|-------------------------------------|-----------------------------------------|--------------------------|--------------------------|
| <b>First girlfriend / boyfriend, n (%)</b>  |                                     |                                     |                                         | <b>0.907<sup>2</sup></b> | <b>0.316<sup>2</sup></b> |
| At the age of 17 or younger                 | 28 (72)                             | 21 (70)                             | 407 (80)                                |                          |                          |
| At the age of 18 or older / never           | 10 (26)                             | 8 (27)                              | 99 (19)                                 |                          |                          |
| Missing                                     | 1 (3)                               | 1 (3)                               | 2 (0)                                   |                          |                          |
| <b>First time falling in love, n (%)</b>    |                                     |                                     |                                         | <b>0.224<sup>1</sup></b> | <b>0.362<sup>1</sup></b> |
| At the age of 18 or younger                 | 33 (85)                             | 28 (93)                             | 462 (91)                                |                          |                          |
| At the age of 19 or older / never           | 5 (13)                              | 1 (3)                               | 42 (8)                                  |                          |                          |
| Missing                                     | 1 (3)                               | 1 (3)                               | 4 (1)                                   |                          |                          |
| <b>First time sexual intimacy, n (%)</b>    |                                     |                                     |                                         | <b>0.986<sup>2</sup></b> | <b>0.534<sup>2</sup></b> |
| At the age of 18 or younger                 | 31 (80)                             | 23 (77)                             | 421 (83)                                |                          |                          |
| At the age of 19 or older / never           | 8 (21)                              | 6 (20)                              | 84 (17)                                 |                          |                          |
| Missing                                     | 0 (0)                               | 1 (3)                               | 4 (1)                                   |                          |                          |
| <b>First time sexual intercourse, n (%)</b> |                                     |                                     |                                         | <b>0.746<sup>2</sup></b> | <b>0.189<sup>2</sup></b> |
| At the age of 18 or younger                 | 27 (69)                             | 19 (63)                             | 296 (58)                                |                          |                          |
| At the age of 19 or older / never           | 12 (31)                             | 10 (33)                             | 210 (41)                                |                          |                          |
| Missing                                     | 0 (0)                               | 1 (3)                               | 2 (0)                                   |                          |                          |

<sup>1</sup> Fisher's Exact test <sup>2</sup> Chi squares test. *P* Values in bold are *P* values <0.01
