# Supplementary material for: Psychosocial development in survivors of childhood differentiated thyroid carcinoma: a cross-sectional study
Source: PubMed Central journal article supplement (PMC5811933; doi:10.1530/eje-17-0741), 2017-12-18
Supplement: eje-178-215-t004.pdf [file eje-178-215-t004.pdf]

**Supplemental Table 2a. Social development in survivors of childhood DTC versus other childhood cancer survivors (diagnosed at age ≥12 years) on item level**

|                                                                                        | <b>DTC Survivors</b><br>n = 35 | <b>Childhood Cancer Survivors</b><br>n = 76 | <i>P</i> Value           |
|----------------------------------------------------------------------------------------|--------------------------------|---------------------------------------------|--------------------------|
| <b>At least one year competitive sports, elementary school, n (%)</b>                  |                                |                                             | 0.059 <sup>2</sup>       |
| Yes                                                                                    | 32 (91)                        | 58 (76)                                     |                          |
| No                                                                                     | 3 (9)                          | 18 (24)                                     |                          |
| Missing                                                                                | 0 (0)                          | 0 (0)                                       |                          |
| <b>Number of friends in kindergarten through third grade, elementary school, n (%)</b> |                                |                                             | <b>0.005<sup>2</sup></b> |
| Less than 4                                                                            | 3 (9)                          | 25 (33)                                     |                          |
| 4 or more                                                                              | 32 (91)                        | 49 (65)                                     |                          |
| Missing                                                                                | 0 (0)                          | 2 (3)                                       |                          |
| <b>Number of friends in fourth-sixth grade, elementary school, n (%)</b>               |                                |                                             | 0.054 <sup>2</sup>       |
| Less than 4                                                                            | 5 (14)                         | 24 (32)                                     |                          |
| 4 or more                                                                              | 30 (86)                        | 52 (68)                                     |                          |
| Missing                                                                                | 0 (0)                          | 0 (0)                                       |                          |
| <b>Best friend, elementary school, n (%)</b>                                           |                                |                                             | <b>0.008<sup>2</sup></b> |
| Yes                                                                                    | 33 (94)                        | 55 (72)                                     |                          |
| No                                                                                     | 2 (6)                          | 21 (28)                                     |                          |
| Missing                                                                                | 0 (0)                          | 0 (0)                                       |                          |
| <b>Most of time playing with ....., elementary school, n (%)</b>                       |                                |                                             | 0.334 <sup>1</sup>       |
| Friends                                                                                | 32 (91)                        | 61 (80)                                     |                          |
| Brothers and/or sisters, parents, on your own                                          | 3 (9)                          | 11 (14)                                     |                          |
| Missing                                                                                | 0 (0)                          | 4 (5)                                       |                          |
| <b>At least one year competitive sports, middle and/or high school, n (%)</b>          |                                |                                             | 0.345 <sup>2</sup>       |
| Yes                                                                                    | 24 (69)                        | 45 (59)                                     |                          |
| No                                                                                     | 11 (31)                        | 31 (41)                                     |                          |
| Missing                                                                                | 0 (0)                          | 0 (0)                                       |                          |
| <b>Number of friends, middle and/or high school, n (%)</b>                             |                                |                                             | 0.394 <sup>2</sup>       |
| Less than 4                                                                            | 10 (29)                        | 28 (37)                                     |                          |
| 4 or more                                                                              | 25 (71)                        | 48 (63)                                     |                          |
| Missing                                                                                | 0 (0)                          | 0 (0)                                       |                          |
| <b>Best friend, middle and/or high school, n (%)</b>                                   |                                |                                             | 0.986 <sup>2</sup>       |
| Yes                                                                                    | 25 (71)                        | 56 (74)                                     |                          |
| No                                                                                     | 9 (26)                         | 20 (26)                                     |                          |
| Missing                                                                                | 1 (3)                          | 0 (0)                                       |                          |
| <b>Belonging to a group of friends, middle and/or high school, n (%)</b>               |                                |                                             | 0.011 <sup>2</sup>       |
| Yes                                                                                    | 33 (94)                        | 59 (78)                                     |                          |
| No                                                                                     | 1 (3)                          | 17 (22)                                     |                          |
| Missing                                                                                | 1 (3)                          | 0 (0)                                       |                          |
| <b>Leisure time, mainly with ....., middle and/or high school, n (%)</b>               |                                |                                             | 0.026 <sup>2</sup>       |
| Friends                                                                                | 31 (89)                        | 51 (67)                                     |                          |
| Brothers and/or sisters, parents, on your own                                          | 4 (11)                         | 23 (30)                                     |                          |
| Missing                                                                                | 0 (0)                          | 2 (3)                                       |                          |
| <b>Going to a bar or disco, middle and/or high school, n (%)</b>                       |                                |                                             | 0.797 <sup>2</sup>       |
| Sometimes / often                                                                      | 28 (80)                        | 61 (80)                                     |                          |
| Never                                                                                  | 6 (17)                         | 15 (20)                                     |                          |
| Missing                                                                                | 1 (3)                          | 0 (0)                                       |                          |
| <b>At least one year competitive sports, after high school, n (%)</b>                  |                                |                                             | 0.920 <sup>2</sup>       |
| Yes                                                                                    | 11 (31)                        | 25 (33)                                     |                          |
| No                                                                                     | 23 (66)                        | 50 (66)                                     |                          |
| Missing                                                                                | 1 (3)                          | 1 (3)                                       |                          |

<sup>1</sup> Fisher's Exact test <sup>2</sup> Chi squares test. *P* Values in bold are *P* values <0.01
