# Supplementary material for: Psychosocial development in survivors of childhood differentiated thyroid carcinoma: a cross-sectional study
Source: PubMed Central journal article supplement (PMC5811933; doi:10.1530/eje-17-0741), 2017-12-18
Supplement: eje-178-215-t005.pdf [file eje-178-215-t005.pdf]

**Supplemental Table 2b. Autonomy development in survivors of childhood DTC versus other childhood cancer survivors (diagnosed at age ≥12 years) on item level**

|                                                                              | <b>DTC<br/>Survivors</b><br>n = 35 | <b>Childhood<br/>Cancer<br/>Survivors</b><br>n = 76 | <i>P</i> Value           |
|------------------------------------------------------------------------------|------------------------------------|-----------------------------------------------------|--------------------------|
| <b>Regular chores/tasks in your family, elementary school, n (%)</b>         |                                    |                                                     | <b>0.033<sup>2</sup></b> |
| Yes                                                                          | 8 (23)                             | 33 (43)                                             |                          |
| No                                                                           | 27 (77)                            | 42 (55)                                             |                          |
| Missing                                                                      | 0 (0)                              | 1 (1)                                               |                          |
| <b>Paid jobs, elementary school, n (%)</b>                                   |                                    |                                                     | <b>0.477<sup>2</sup></b> |
| Yes                                                                          | 8 (23)                             | 22 (29)                                             |                          |
| No                                                                           | 27 (77)                            | 53 (70)                                             |                          |
| Missing                                                                      | 0 (0)                              | 1 (1)                                               |                          |
| <b>Regular chores/tasks in your family, middle and/or high school, n (%)</b> |                                    |                                                     | <b>0.349<sup>2</sup></b> |
| Yes                                                                          | 16 (46)                            | 42 (55)                                             |                          |
| No                                                                           | 19 (54)                            | 34 (45)                                             |                          |
| Missing                                                                      | 0 (0)                              | 0 (0)                                               |                          |
| <b>Paid jobs, middle and/or high school, n (%)</b>                           |                                    |                                                     | <b>0.097<sup>2</sup></b> |
| At the age of 18 or younger                                                  | 32 (91)                            | 59 (78)                                             |                          |
| At the age of 19 or older / never                                            | 3 (9)                              | 17 (22)                                             |                          |
| Missing                                                                      | 0 (0)                              | 0 (0)                                               |                          |
| <b>First time vacation without adults, n (%)</b>                             |                                    |                                                     | <b>0.146<sup>2</sup></b> |
| At the age of 17 or younger                                                  | 24 (69)                            | 41 (54)                                             |                          |
| At the age of 18 or older / never                                            | 11 (31)                            | 35 (46)                                             |                          |
| Missing                                                                      | 0 (0)                              | 0 (0)                                               |                          |
| <b>Leaving parents' home, n (%)</b>                                          |                                    |                                                     | <b>0.936<sup>2</sup></b> |
| Not living with parents                                                      | 26 (74)                            | 57 (75)                                             |                          |
| Still living with parents                                                    | 9 (26)                             | 19 (25)                                             |                          |
| Missing                                                                      | 0 (0)                              | 0 (0)                                               |                          |

<sup>1</sup> Fisher's Exact test <sup>2</sup> Chi squares test. *P* Values in bold are *P* values <0.01
