# Supplementary material for: Psychosocial development in survivors of childhood differentiated thyroid carcinoma: a cross-sectional study
Source: PubMed Central journal article supplement (PMC5811933; doi:10.1530/eje-17-0741), 2017-12-18
Supplement: eje-178-215-t006.pdf [file eje-178-215-t006.pdf]

**Supplemental Table 2c. Psychosexual development in survivors of childhood DTC versus other childhood cancer survivors (diagnosed at age  $\geq 12$  years) on item level**

|                                             | <b>DTC<br/>Survivors</b><br>n = 35 | <b>Childhood<br/>Cancer<br/>Survivors</b><br>n = 76 | <i>P</i> Value     |
|---------------------------------------------|------------------------------------|-----------------------------------------------------|--------------------|
| <b>First girlfriend / boyfriend, n (%)</b>  |                                    |                                                     | 0.080 <sup>2</sup> |
| At the age of 17 or younger                 | 26 (74)                            | 45 (59)                                             |                    |
| At the age of 18 or older / never           | 8 (23)                             | 31 (41)                                             |                    |
| Missing                                     | 1 (3)                              | 0 (0)                                               |                    |
| <b>First time falling in love, n (%)</b>    |                                    |                                                     | 0.696 <sup>1</sup> |
| At the age of 18 or younger                 | 30 (86)                            | 68 (90)                                             |                    |
| At the age of 19 or older / never           | 4 (11)                             | 7 (9)                                               |                    |
| Missing                                     | 1 (3)                              | 1 (1)                                               |                    |
| <b>First time sexual intimacy, n (%)</b>    |                                    |                                                     | 0.256 <sup>2</sup> |
| At the age of 18 or younger                 | 30 (86)                            | 58 (76)                                             |                    |
| At the age of 19 or older / never           | 5 (14)                             | 18 (24)                                             |                    |
| Missing                                     | 0 (0)                              | 0 (0)                                               |                    |
| <b>First time sexual intercourse, n (%)</b> |                                    |                                                     | 0.010 <sup>2</sup> |
| At the age of 18 or younger                 | 27 (77)                            | 39 (51)                                             |                    |
| At the age of 19 or older / never           | 8 (23)                             | 37 (49)                                             |                    |
| Missing                                     | 0 (0)                              | 0 (0)                                               |                    |

<sup>1</sup> Fisher's Exact test <sup>2</sup> Chi squares test. *P* Values in bold are *P* values <0.01
