# Supplementary material for: Psychosocial development in survivors of childhood differentiated thyroid carcinoma: a cross-sectional study
Source: PubMed Central journal article supplement (PMC5811933; doi:10.1530/eje-17-0741), 2017-12-18
Supplement: eje-178-215-t007.pdf [file eje-178-215-t007.pdf]

**Supplemental Table 3. Characteristics of survivors of childhood DTC versus survivors of other childhood cancers (diagnosed at all ages)**

|                                     | DTC Survivors<br>n = 39 | Childhood<br>Cancer<br>Survivors<br>n = 350 <sup>  </sup> | P Value                       |
|-------------------------------------|-------------------------|-----------------------------------------------------------|-------------------------------|
| <b>At diagnosis</b>                 |                         |                                                           |                               |
| Age at diagnosis, y                 | 15.6 (8.7-18.7)         | 6.3 (0.0-17.0)                                            | <b>0.001</b> <sup>§</sup>     |
| Sex, n (%)                          |                         |                                                           | <b>&lt;0.001</b> <sup>‡</sup> |
| Female                              | 34 (87)                 | 176 (50)                                                  |                               |
| Male                                | 5 (13)                  | 175 (50)                                                  |                               |
| <b>At follow-up</b>                 |                         |                                                           |                               |
| Age at evaluation, y                | 26.2 (18.8-35.7)        | 24.4 (17.7-31.1)                                          | 0.021 <sup>§</sup>            |
| Follow-up period, y                 | 10.7 (5.0-25.3)         | 16.9 (6.2-30.7)                                           | <b>&lt;0.001</b> <sup>§</sup> |
| Employment, n (%)                   |                         |                                                           | 0.338 <sup>†</sup>            |
| Employed and/or student             | 38 (97)                 | 318 (91)                                                  |                               |
| Not employed and no student         | 1 (3)                   | 27 (8)                                                    |                               |
| Missing                             | 0 (0)                   | 5 (1)                                                     |                               |
| Completed education, n (%)          |                         |                                                           | <b>&lt;0.001</b> <sup>‡</sup> |
| Low level                           | 7 (18)                  | 113 (32)                                                  |                               |
| Medium level                        | 15 (39)                 | 167 (48)                                                  |                               |
| High level                          | 17 (44)                 | 54 (15)                                                   |                               |
| Missing                             | 0 (0)                   | 16 (5)                                                    |                               |
| Marital status <sup>¶</sup> , n (%) |                         |                                                           | n.a.                          |
| Relationship                        | 24 (62)                 | -                                                         |                               |
| No relationship                     | 15 (38)                 | -                                                         |                               |
| Marital status <sup>¶</sup> , n (%) |                         |                                                           | n.a.                          |
| Not married and not living together | -                       | 234 (67)                                                  |                               |
| Married or living together          | -                       | 104 (30)                                                  |                               |
| Missing                             | -                       | 12 (3)                                                    |                               |

† Fisher's Exact Test ‡ Chi square test § Mann Whitney U test. || n = 350, three childhood cancer survivors diagnosed with thyroid cancer were removed for analyses (two had thyroid carcinoma as primary malignancy, one had thyroid cancer as second malignant neoplasm); ¶ answer options regarding marital status of two different questionnaires were non-mergeable, therefore these are shown separately. Missing values were excluded for statistical testing (pairwise deletion). Continuous variables are presented as median (range). P Values in bold indicate a significant difference ( $P < 0.01$ ). Abbreviations: DTC, differentiated thyroid carcinoma; n.a., not applicable.
