# Supplementary material for: Psychosocial development in survivors of childhood differentiated thyroid carcinoma: a cross-sectional study
Source: PubMed Central journal article supplement (PMC5811933; doi:10.1530/eje-17-0741), 2017-12-18
Supplement: eje-178-215-t008.pdf [file eje-178-215-t008.pdf]

**Supplemental Table 4. Scores on psychosocial developmental domains of survivors of childhood DTC versus survivors of other childhood cancers (diagnosed at all ages)**

|                                              | DTC survivors | Childhood Cancer Survivors (CCS) |                   |                                  |                   |                         |                   |                        |                   |
|----------------------------------------------|---------------|----------------------------------|-------------------|----------------------------------|-------------------|-------------------------|-------------------|------------------------|-------------------|
|                                              | n = 39        | Total CCS<br>n = 350             |                   | Leukemia/<br>lymphoma<br>n = 175 |                   | Solid tumors<br>n = 150 |                   | Brain tumors<br>n = 25 |                   |
|                                              |               |                                  | <i>P</i><br>Value |                                  | <i>P</i><br>Value |                         | <i>P</i><br>Value |                        | <i>P</i><br>Value |
| <b>Social development</b> <sup>†</sup>       | 22 (20.3, 23) | 21 (18, 22)                      | <b>0.008</b>      | 20 (18, 22)                      | <b>0.004</b>      | 21 (19, 23)             | 0.068             | 20 (17, 22)            | <b>0.003</b>      |
| <b>Autonomy development</b> <sup>‡</sup>     | 9 (8, 10)     | 9 (8, 10)                        | 0.734             | 9 (8, 10)                        | 0.693             | 9 (8, 10)               | 0.974             | 9 (8, 10)              | 0.278             |
| <b>Psychosexual development</b> <sup>§</sup> | 8 (6.5, 8)    | 7 (5, 8)                         | 0.036             | 7 (5, 8)                         | 0.042             | 7 (6, 8)                | 0.097             | 5 (4, 8)               | <b>0.007</b>      |

Scores are shown as median (p25, p27). Comparisons between DTC survivors and other groups were performed using Mann Whitney U tests. Higher score indicates achievement of earlier or more psychosocial developmental milestones; †, scale ranges 12-24; ‡, scale ranges 6-12; §, scale ranges 4-8. Missing values were excluded for statistical testing. *P* values in bold indicate a significant value ( $P < 0.01$ ). Abbreviation: DTC, differentiated thyroid carcinoma; CCS, childhood cancer survivors.
