# Supplementary material for: Psychosocial development in survivors of childhood differentiated thyroid carcinoma: a cross-sectional study
Source: PubMed Central journal article supplement (PMC5811933; doi:10.1530/eje-17-0741), 2017-12-18
Supplement: eje-178-215-t009.pdf [file eje-178-215-t009.pdf]

**Supplemental Table 5. Medical characteristics associated with psychosocial development scales in survivors of childhood DTC**

|                                            | Social development |                    | Autonomy development |                    | Psychosexual development |                    |
|--------------------------------------------|--------------------|--------------------|----------------------|--------------------|--------------------------|--------------------|
|                                            |                    | <i>P</i> Value     |                      | <i>P</i> Value     |                          | <i>P</i> Value     |
| <b>Survivor characteristics</b>            |                    |                    |                      |                    |                          |                    |
| <b>Sex, n (%)</b>                          |                    | 0.790 <sup>†</sup> |                      | 0.107 <sup>†</sup> |                          | 0.949 <sup>†</sup> |
| Females (n = 34)                           | 22                 |                    | 9                    |                    | 8                        |                    |
| Males (n = 5)                              | 22                 |                    | 8                    |                    | 8                        |                    |
| <b>Age at evaluation, years</b>            |                    | 0.946 <sup>‡</sup> |                      | 0.043 <sup>‡</sup> |                          | 0.713 <sup>‡</sup> |
| Correlation coefficient                    | -0.012             |                    | 0.325                |                    | 0.063                    |                    |
| <b>Tumor characteristics</b>               |                    |                    |                      |                    |                          |                    |
| <b>Age at diagnosis, years</b>             |                    | 0.691 <sup>‡</sup> |                      | 0.816 <sup>‡</sup> |                          | 0.140 <sup>‡</sup> |
| Correlation coefficient                    | 0.069              |                    | 0.038                |                    | 0.248                    |                    |
| <b>T stage, n (%)</b>                      |                    | 0.676 <sup>†</sup> |                      | 0.578 <sup>†</sup> |                          | 0.224 <sup>†</sup> |
| T1-2 (n = 27)                              | 22                 |                    | 9                    |                    | 8                        |                    |
| T3-4 (n = 10)                              | 23                 |                    | 10                   |                    | 6                        |                    |
| <b>N stage, n (%)</b>                      |                    | 0.539 <sup>†</sup> |                      | 0.989 <sup>†</sup> |                          | 0.772 <sup>†</sup> |
| N0 (n = 16)                                | 23                 |                    | 9                    |                    | 8                        |                    |
| N1 (n = 23)                                | 22                 |                    | 9                    |                    | 8                        |                    |
| <b>M stage, n (%)</b>                      |                    | 0.292 <sup>†</sup> |                      | 0.474 <sup>†</sup> |                          | 0.350 <sup>†</sup> |
| M0 (n = 34)                                | 22                 |                    | 9                    |                    | 8                        |                    |
| M1 (n = 5)                                 | 21                 |                    | 9                    |                    | 6                        |                    |
| <b>Histology, n (%)</b>                    |                    | 0.450 <sup>†</sup> |                      | 0.488 <sup>†</sup> |                          | 0.293 <sup>†</sup> |
| PTC (n = 35)                               | 22                 |                    | 9                    |                    | 8                        |                    |
| FTC (n = 4)                                | 23                 |                    | 9                    |                    | 8                        |                    |
| <b>Treatment characteristics</b>           |                    |                    |                      |                    |                          |                    |
| <b>Permanent hypoparathyroidism, n (%)</b> |                    | 0.428 <sup>†</sup> |                      | 0.832 <sup>†</sup> |                          | 0.428 <sup>†</sup> |
| Yes (n = 10)                               | 21                 |                    | 10                   |                    | 8                        |                    |
| No (n = 28)                                | 22                 |                    | 10                   |                    | 8                        |                    |
| <b>RLN injury, n (%)</b>                   |                    | 0.955 <sup>†</sup> |                      | 0.450 <sup>†</sup> |                          | 0.565 <sup>†</sup> |
| Yes (n = 4)                                | 22                 |                    | 9                    |                    | 7                        |                    |
| No (n = 32)                                | 22                 |                    | 9                    |                    | 8                        |                    |
| <b>Cumulative 131-I dose, MBq</b>          |                    | 0.511 <sup>‡</sup> |                      | 0.114 <sup>‡</sup> |                          | 0.946 <sup>‡</sup> |
| Correlation coefficient                    | 0.113              |                    | 0.257                |                    | 0.012                    |                    |
| <b>Follow-up characteristics</b>           |                    |                    |                      |                    |                          |                    |
| <b>TSH suppression, mU/l</b>               |                    | 0.448 <sup>‡</sup> |                      | 0.858 <sup>‡</sup> |                          | 0.396 <sup>‡</sup> |
| Correlation coefficient                    | 0.129              |                    | 0.035                |                    | 0.142                    |                    |
| <b>Follow-up duration, years</b>           |                    | 0.615 <sup>‡</sup> |                      | 0.038 <sup>‡</sup> |                          | 0.700 <sup>‡</sup> |
| Correlation coefficient                    | -0.087             |                    | 0.334                |                    | -0.065                   |                    |
| <b>Outcome, n (%)</b>                      |                    | 0.043 <sup>§</sup> |                      | 0.539 <sup>§</sup> |                          | 0.789 <sup>§</sup> |
| Remission (n = 32)                         | 22                 |                    | 9                    |                    | 8                        |                    |
| Recurrence (n = 3)                         | 23                 |                    | 12                   |                    | 8                        |                    |
| Persistent disease (n = 4)                 | 24                 |                    | 10                   |                    | 8                        |                    |

Scores are presented as medians, except when otherwise specified. † Mann-Whitney U test ‡ Spearman's rank correlation coefficient § Kruskal-Wallis test. *P* Values in bold are *P* values <0.01. Abbreviations: DTC, differentiated thyroid carcinoma; TNM stage (according to 7<sup>th</sup> ed. Of American Joint Committee<sup>a</sup>), tumor node metastases stage; RLN, recurrent laryngeal nerve; 131-I, radioactive iodine; MBq, megabecquerel; TSH, thyrotropin; mU/l, milliunits per liter.

<sup>a</sup> Sobin LH, Gospodarowicz MK, Wittekind C, eds. TNM Classification of Malignant Tumours. 7th ed. Oxford, United Kingdom: Wiley-Blackwell; 2009.
